# Supplementary material
Source: Springer Nature journal article supplement (https://www.springermedizin.de/resource/supplementary/12891_2011_1454_MOESM2_ESM.pdf/9508302)
Supplement: MOESM2 [file 9508302]

# SIDIAP

PATIENTS AVAILABLE  
IN THE YEAR 2009  
N=5,805,093

STUDY POPULATION  
( $\geq 50$  YEARS)  
N=2,011,430

2,706 (0.13%)  
TRANSFERRED  
OUT

0.997 YEARS  
FOLLOW-UP

14,002 (0.69%)  
DEATHS

2,005,396  
PERSON-YEARS  
AT RISK
